# Supplementary material for: Cytotoxic gold(iii) complexes incorporating a 2,2′:6′,2′′-terpyridine ligand framework – the impact of the substituent in the 4′-position of a terpy ring
Source: Royal Society of Chemistry journal article supplement (doi:10.1039/c6dt04584g), 2017-01-01
Supplement: c6dt04584g1.pdf [file c6dt04584g1.pdf]

**Electronic Supplementary Information** (ESI) for the manuscript:

**Cytotoxic gold(III) complexes incorporating 2,2':6',2''-terpyridine ligand framework – the impact of the substituent in 4'-position of terpy ring**

K. Czerwińska<sup>a</sup>, M. Golec<sup>b,c</sup>, M. Skonieczna<sup>d,e</sup>, J. Palion-Gazda<sup>a</sup>, D. Zygadło<sup>b,c</sup>, A. Szlapa-Kulaf, S. Krompiec<sup>f</sup>, B. Machura<sup>a</sup> and A Szurko<sup>b,c</sup>

*a. Department of Crystallography, Institute of Chemistry, University of Silesia, 9th Szkolna St, 40-006 Katowice, Poland*

*b. August Chelkowski Institute of Physics, University of Silesia, Uniwersytecka 4, 40-007 Katowice, Poland.*

*c. Silesia Center for Education and Interdisciplinary Research, 75 Pułku Piechoty 1A, 41-500 Chorzów, Poland, \*mail: agnieszka.szurko@us.edu.pl*

*d. Silesian University of Technology, Center Biotechnology Bioengineering and Bioinformatics, Gliwice, Poland*

*e. Silesian University of Technology, Institute of Automatic Control, Gliwice, Poland*

*f. Department of Inorganic, Organometallic Chemistry and Catalysis, Institute of Chemistry, University of Silesia, 9thSzkolna St., 40-006 Katowice, Poland*

## Table of Contents

|                                                                                                                                                |            |
|------------------------------------------------------------------------------------------------------------------------------------------------|------------|
| 1. XRPD pattern of <b>1</b>                                                                                                                    | Figure S1  |
| 2. XRPD pattern of <b>2</b>                                                                                                                    | Figure S2  |
| 3. IR spectrum of <b>1</b>                                                                                                                     | Figure S3  |
| 4. IR spectrum of <b>2</b>                                                                                                                     | Figure S4  |
| 5. IR spectrum of [AuCl(terpy)](PF <sub>6</sub> ) <sub>2</sub>                                                                                 | Figure S5  |
| 6. UV-vis spectra of the free ligands in DMSO over 24 h.                                                                                       | Figure S6  |
| 7. UV-Vis spectra of [AuCl(terpy)](PF <sub>6</sub> ) <sub>2</sub> in DMSO and 10 mM PBS over 24h.                                              | Figure S7  |
| 8. The selected structural data for Au(III) coordination compounds incorporating 2,2':6',2''-terpyridine derivatives.                          | Table S1   |
| 9. X—Y•••Cg(J)( $\pi$ -ring) interactions for <b>1</b> , <b>2</b> and [AuCl(terpy)](PF <sub>6</sub> ) <sub>2</sub> .                           | Table S2   |
| 10. Short $\pi$ ••• $\pi$ interactions for <b>1</b>                                                                                            | Table S3   |
| 11. Short intra- and intermolecular hydrogen bonds detected in structures <b>1</b> , <b>2</b> and [AuCl(terpy)](PF <sub>6</sub> ) <sub>2</sub> | Table S4   |
| 12. Crystal data and structure refinement for [AuCl(terpy)](PF <sub>6</sub> ) <sub>2</sub>                                                     | Table S5   |
| 13. The bond lengths [Å] and angles [°] for [AuCl(terpy)](PF <sub>6</sub> ) <sub>2</sub>                                                       | Table S6   |
| 14. Molecular structure of [AuCl(terpy)](PF <sub>6</sub> ) <sub>2</sub> .                                                                      | Figure S8  |
| 15. View of the supramolecular packing of [AuCl(terpy)](PF <sub>6</sub> ) <sub>2</sub>                                                         | Figure S9  |
| 16. Cells viability after compounds <b>1</b> and <b>2</b> treatment                                                                            | Figure S10 |
| 17. Cells viability after ligands 4'-R <sup>1</sup> -terpy and 4'-R <sup>2</sup> -terpy treatment                                              | Figure S11 |
| 18. Cells viability after [AuCl(terpy)](PF <sub>6</sub> ) <sub>2</sub> and cisplatin treatment                                                 | Figure S12 |
| 19. <sup>1</sup> H and <sup>31</sup> P NMR spectra of compound <b>1</b>                                                                        | Figure S13 |
| 20. <sup>1</sup> H and <sup>31</sup> P NMR spectra of compound <b>2</b>                                                                        | Figure S14 |
| 21. <sup>1</sup> H and <sup>31</sup> P NMR spectra of compound [AuCl(terpy)](PF <sub>6</sub> ) <sub>2</sub>                                    | Figure S15 |

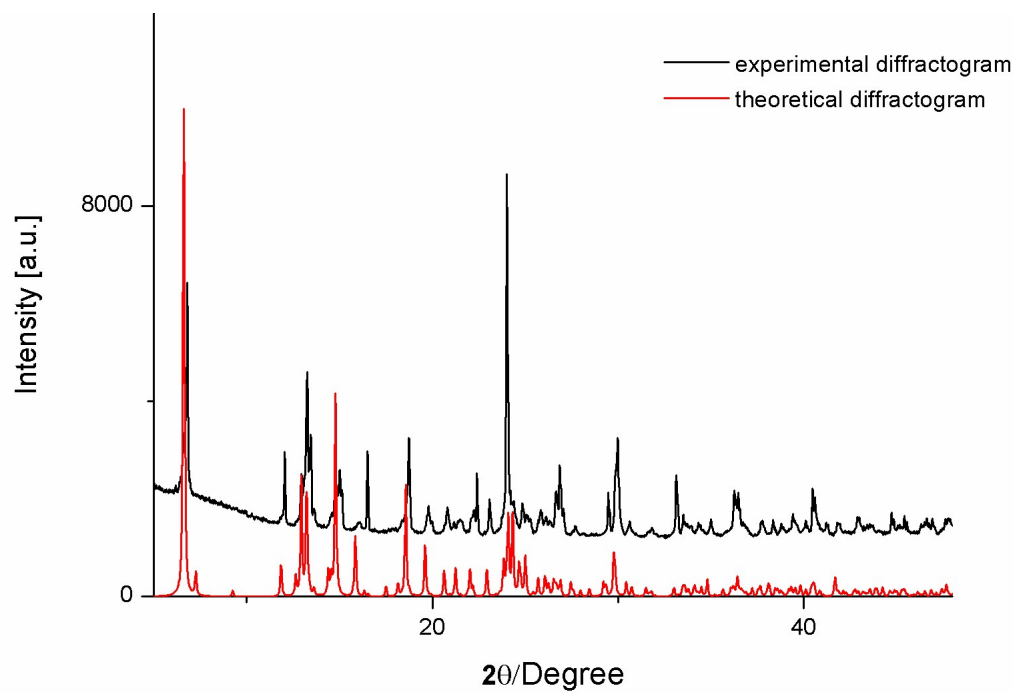

**Figure S1.** XRPD pattern of **1** (experimental - black) and the simulation of its powder pattern from the crystal structure (red).

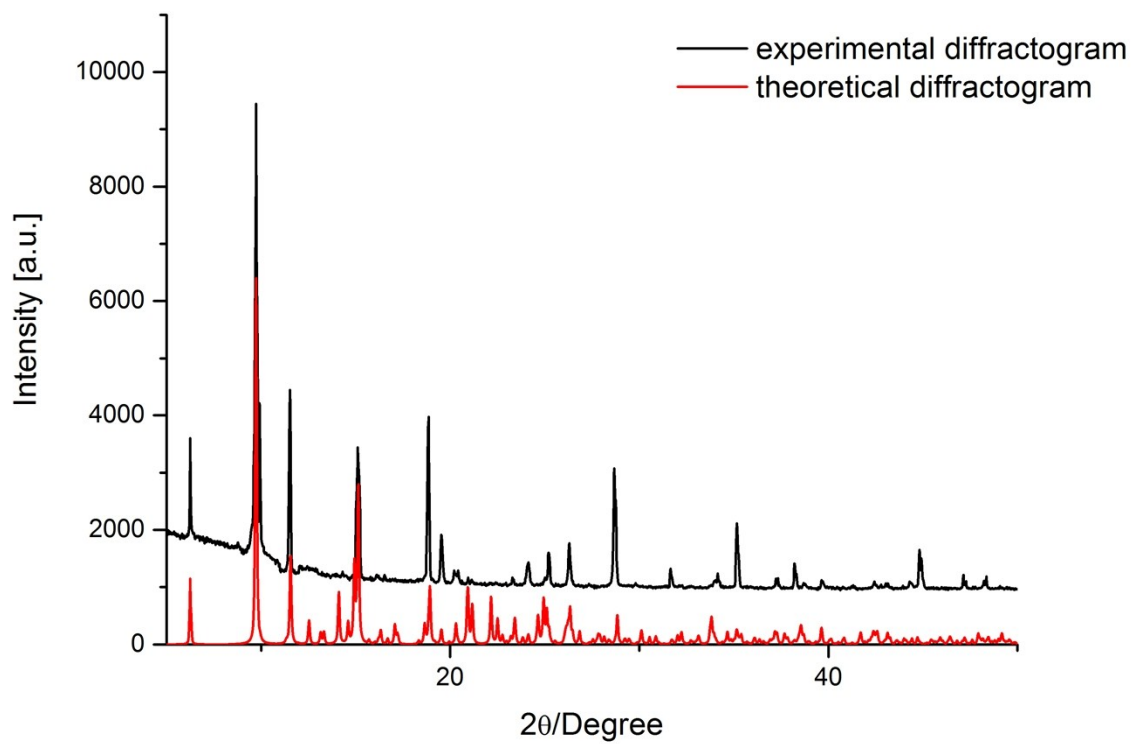

**Figure S2.** XRPD pattern of **2** (experimental - black) and the simulation of its powder pattern from the crystal structure (red).

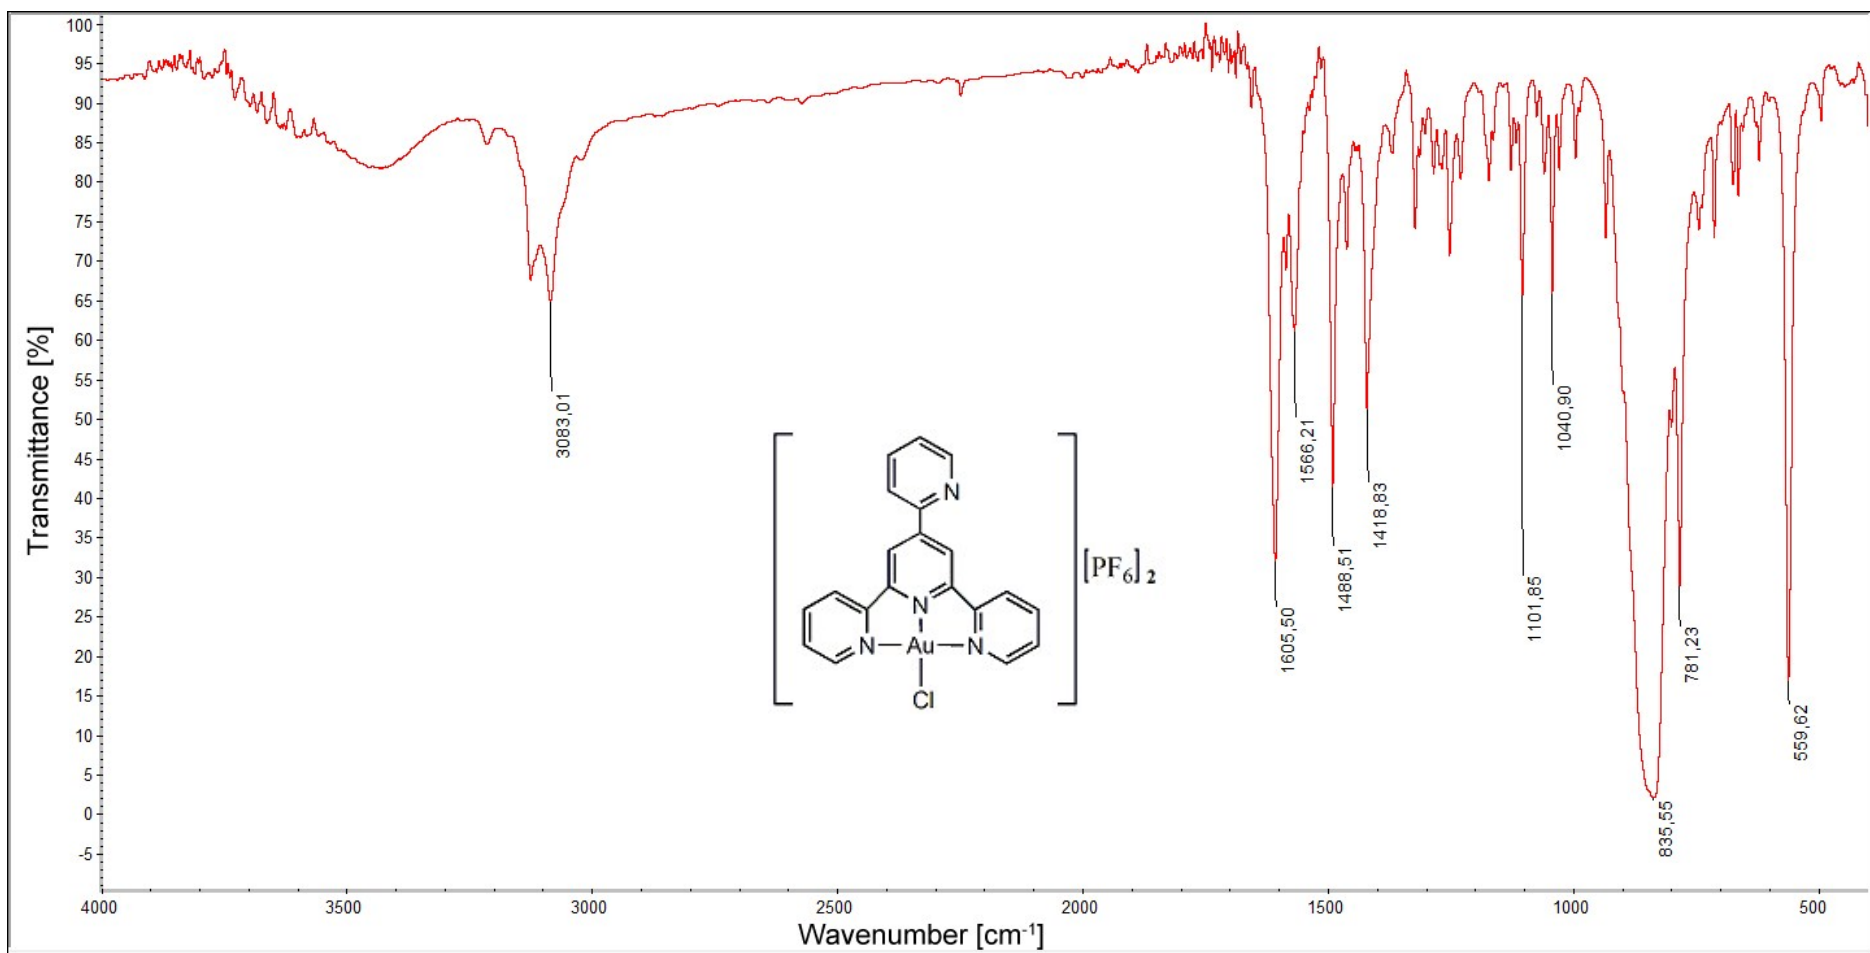

Figure S3. IR spectrum of 1.

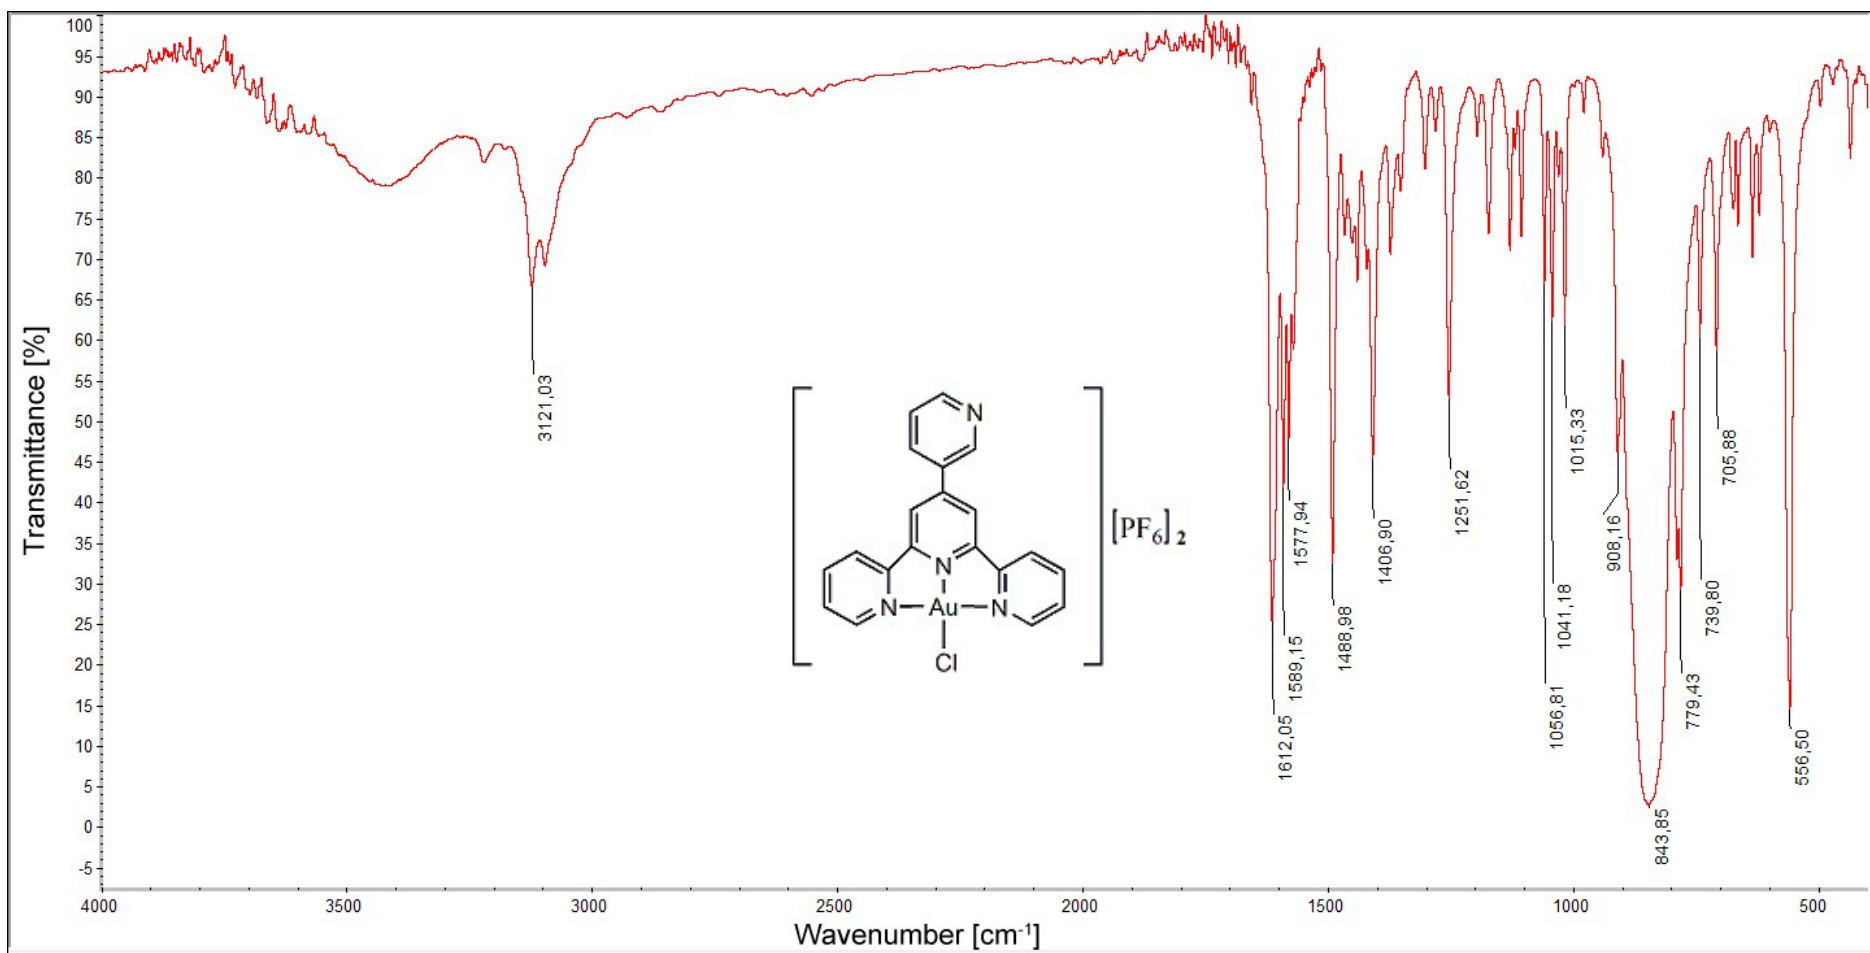

Figure S4. IR spectrum of **2**.

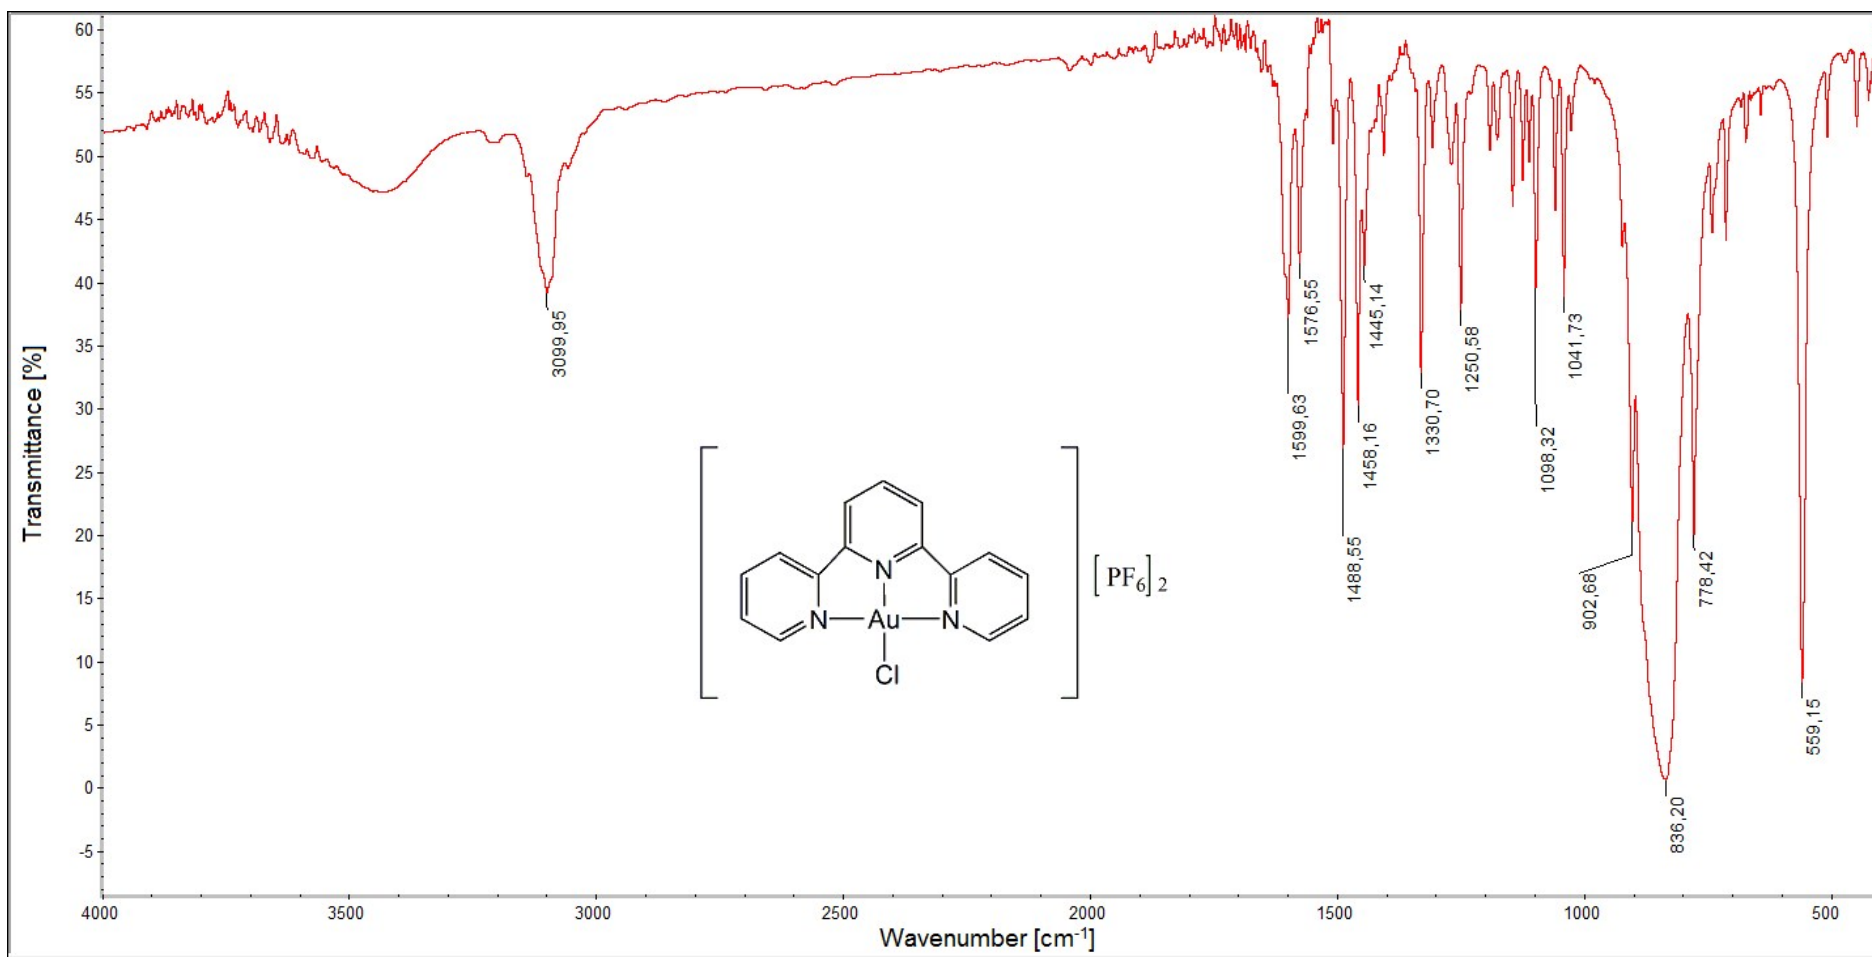

Figure S5. IR spectrum of [AuCl(terpy)](PF<sub>6</sub>)<sub>2</sub>.

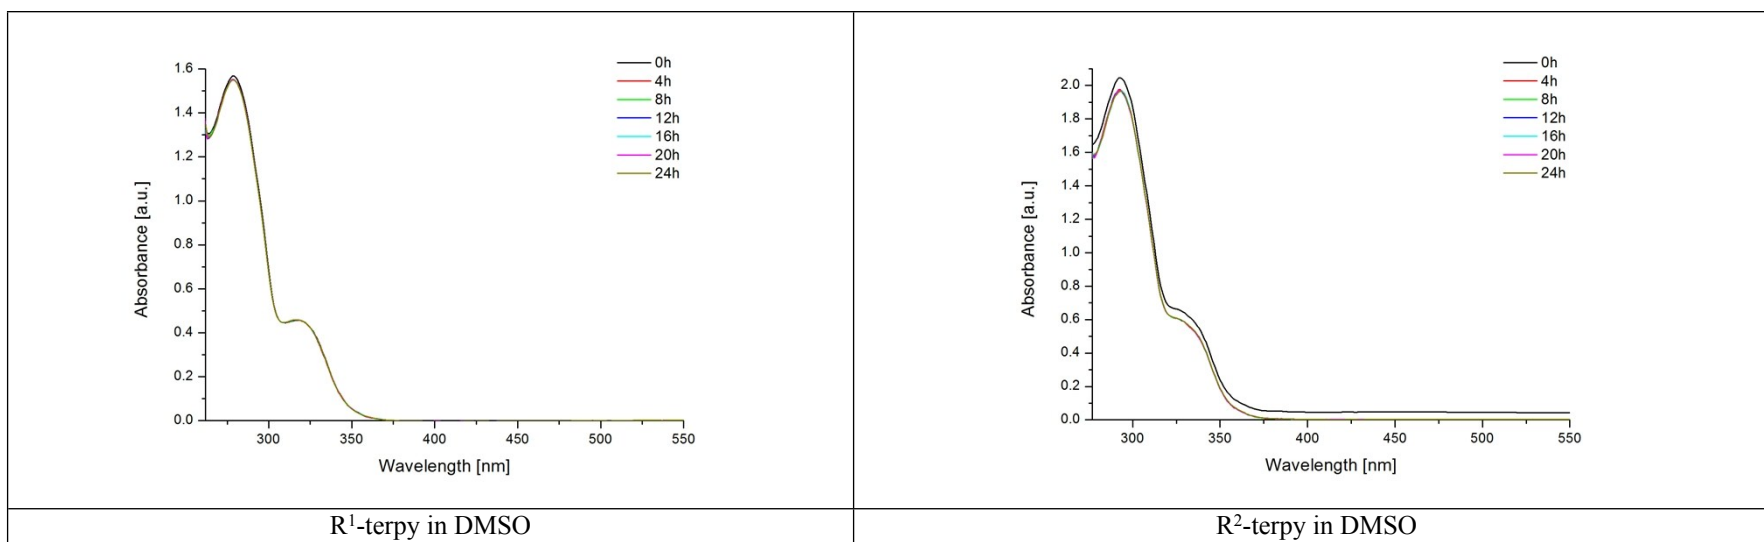

Figure S6. UV-Vis spectra of the free ligands in DMSO over 24 h.

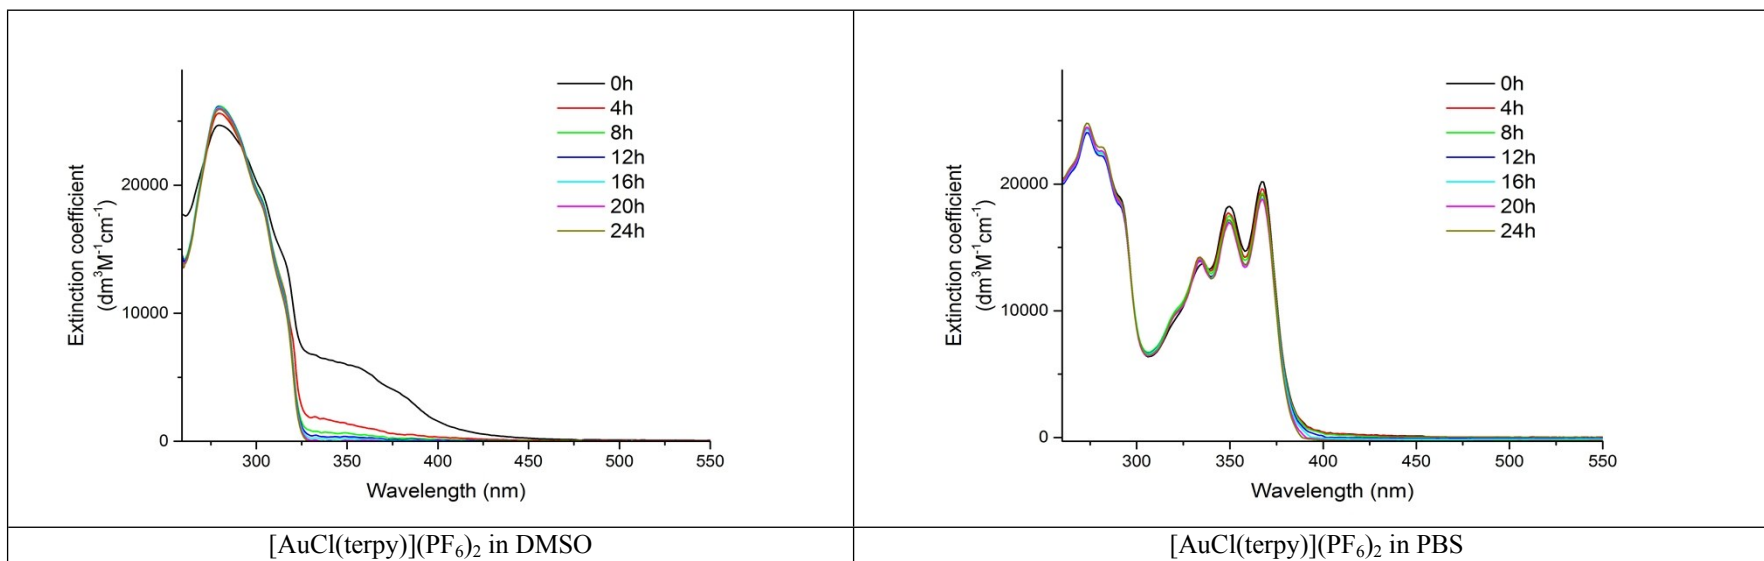

Figure S7. UV-Vis spectra of [AuCl(terpy)](PF₆)₂ in DMSO and 10 mM phosphate-buffered saline (PBS) over 24h.



**Table S1.** The selected structural data for Au(III) coordination compounds incorporating 2,2':6',2''-terpyridine derivatives.

| Compound <sup>a</sup>                                                                      | Au-N <sub>c</sub> (Å) | Au-N <sub>d</sub> (Å)  | Au-Cl (Å)   | Au-F (Å)                            | N <sub>c</sub> <sup>b</sup> -Au-N <sub>d</sub> <sup>c</sup> [°] | N <sub>d</sub> -Au-N <sub>d</sub> [°] | C-N <sub>d</sub> -C [°] | C-N <sub>c</sub> -C [°] | Ref. |
|--------------------------------------------------------------------------------------------|-----------------------|------------------------|-------------|-------------------------------------|-----------------------------------------------------------------|---------------------------------------|-------------------------|-------------------------|------|
| <b>1</b>                                                                                   | 1.938(8)              | 2.020(8)<br>2.027(8)   | 2.257(3)    | 3.075(14)<br>3.061(17) <sup>d</sup> | 81.6(3)<br>81.3(3)                                              | 162.9(3)                              | 120.0(9)<br>121.3(9)    | 124.2(8)                | –    |
| <b>2</b>                                                                                   | 1.971(7)              | 2.047(8)<br>2.017(8)   | 2.257(3)    | 3.11(1)<br>2.885(6)                 | 79.8(3)<br>82.1(3)                                              | 161.8(3)                              | 121.6(9)<br>121.4(9)    | 125.9(8)                |      |
| [AuCl(terpy)](PF <sub>6</sub> ) <sub>2</sub>                                               | 1.935(9)              | 2.014(9)<br>2.032(9)   | 2.253(3)    | 3.03(3)<br>3.16(2)                  | 81.0(4)<br>81.9(4)                                              | 162.7(4)                              | 122.3(10)<br>120.9(10)  | 124.2(10)               |      |
| [AuCl(terpy)]Cl <sub>2</sub> ·3H <sub>2</sub> O                                            | 1.931(7)              | 2.029(6)<br>2.018(6)   | 2.269(2)    | –                                   | 81.4 (3)<br>81.4 (3)                                            | 162.7(3)                              | 121.5(7)<br>121.1(7)    | 123.4(7)                | 1    |
| [AuCl(terpy)] <sub>2</sub> [AuCl <sub>2</sub> ] <sub>3</sub> [AuCl <sub>4</sub> ]          | 1.941(8)              | 2.022(9)<br>2.030(8)   | 2.271(3)    | –                                   | 81.3(4)<br>81.4(4)                                              | 162.6(4)                              | 120.1 (9)<br>121.0(9)   | 124.5(9)                |      |
| [Au(4-MeOPh-terpy)Cl](ClO <sub>4</sub> ) <sub>2</sub>                                      | 1.924(6)              | 2.020(7)<br>2.047(7)   | 2.2559(24)  | –                                   | 80.1(3)<br>82.5(3)                                              | 162.6(3)                              | 120.3(7)<br>122.2(7)    | 123.1(7)                | 2    |
| [AuCl(S-8)] (SO <sub>3</sub> CF <sub>3</sub> ) <sub>2</sub>                                | 1.945(7)              | 2.025(8)<br>2.018(8)   | 2.259(3)    | –                                   | 81.4(3)<br>81.2(3)                                              | 162.5(3)                              | 119.6(8)<br>120.6(9)    | 124.4(8)                | 3    |
| [Au(terpy)(OH)](ClO <sub>4</sub> ) <sub>2</sub>                                            | 1.949(4)              | 2.009(5)<br>2.008(4)   | –           | –                                   | 81.2(2)<br>81.5(2)                                              | 162.6(2)                              | 121.4(5)<br>120.7(5)    | 125.4(4)                | 4    |
| [AuCl(terpy)]Cl <sub>2</sub> ·3H <sub>2</sub> O                                            | 1.950 (3)             | 2.021 (4)<br>2.025 (4) | 2.2686 (11) | –                                   | 81.39 (15)<br>81.25 (15)                                        | 162.64 (15)                           | 121.1 (4)<br>120.7 (4)  | 125.6 (4)               | 5    |
| [AuCl(terpy)](BF <sub>4</sub> ) <sub>2</sub>                                               | 1.947(3)              | 2.014(3)<br>2.028(3)   | 2.2574(10)  | 2.915(3)<br>3.130(2)                | 80.88(16)<br>81.53(16)                                          | 162.94(12)                            | 120.0(5)<br>121.3(6)    | 125.2(3)                | 6    |
| [AuCl(terpy)](SO <sub>3</sub> CF <sub>3</sub> ) <sub>2</sub>                               | 1.954(4)              | 2.014(4)<br>2.026(4)   | 2.2711(12)  | –                                   | 81.69(13)<br>81.36(13)                                          | 162.37(17)                            | 119.5(4)<br>120.7(4)    | 124.3(4)                |      |
| [Au(4-DMAP(terpy)](SO <sub>3</sub> CF <sub>3</sub> ) <sub>2</sub>                          | 1.934(5)              | 2.015(5)<br>2.013(4)   | –           | –                                   | 81.38(19)<br>81.53(19)                                          | 162.9(2)                              | 120.1(5)<br>121.5(5)    | 124.3(5)                | 7    |
| [Au(terpy)(OH)](SO <sub>3</sub> CF <sub>3</sub> ) <sub>2</sub>                             | 1.963(4)              | 2.020(5)<br>2.015(5)   | –           | –                                   | 81.2(2)<br>82.0(2)                                              | 163.2(2)                              | 120.9(5)<br>120.9(5)    | 126.3(5)                |      |
| [Au(terpy)(NHpyCl)](ClO <sub>4</sub> ) <sub>2</sub>                                        | 1.960(5)              | 2.031(5)<br>2.032(5)   | –           | –                                   | 80.9(2)<br>80.85(19)                                            | 161.7(2)                              | 120.0(5)<br>121.3(6)    | 123.4(5)                | 8    |
| [Au(terpy)(NHpymCl)](ClO <sub>4</sub> ) <sub>2</sub>                                       | 1.947(11)             | 2.001(10)<br>2.014(11) | –           | –                                   | 81.4(5)<br>81.5(5)                                              | 162.5(5)                              | 119.3(10)<br>122.0(12)  | 124.2(12)               |      |
| [Au(terpy)(NHpym)](ClO <sub>4</sub> ) <sub>2</sub>                                         | 1.940(10)             | 2.023(10)<br>2.053(11) | –           | –                                   | 80.8(4)<br>80.4(4)                                              | 161.1(4)                              | 119.3(10)<br>123.4(10)  | 123.4(10)               |      |
| [Au(C <sub>6</sub> F <sub>5</sub> )(η <sup>3</sup> -terpy)](PF <sub>6</sub> ) <sub>2</sub> | 1.985(3)              | 2.028(3)<br>2.025(3)   | –           | 3.148(2)<br>3.040(3)                | 80.88(11)<br>80.60(11)                                          | 161.45(11)                            | 120.2(3)<br>120.2(3)    | 124.9(3)                | 9    |

<sup>a</sup> Abbreviation for the ligands: terpy – 2,2':6',2''-terpyridine, S-8 – 4'-(methylthio)-2,2':6',2''-terpyridinyl, 4-MeOPh-terpy – 4'-(4-methoxyphenyl)-2,2',6',2''-terpyridine, 4-DMAP- 4-dimethylamoniopyridine, NH<sub>2</sub>pyCl – 2-amino-5-chloropyridine, NH<sub>2</sub>pymCl – 2-amino-4-chloro-pyrimidine, NH<sub>2</sub>pym – 2-aminopyrimidine.

<sup>b</sup> N<sub>c</sub> – central nitrogen atom of terpyridine ligand

<sup>c</sup> N<sub>d</sub> – distal nitrogen atoms of terpyridine ligand

<sup>d</sup> Symmetry code: (d) = -1/2+x, 1/2-y, -1/2+z

**Table S2.** X—Y...Cg(J)( $\pi$ -ring) interactions for **1**, **2** and [AuCl(terpy)](PF<sub>6</sub>)<sub>2</sub>.

| Y-X(I)...Cg(J)                               | X(I)...Cg(J) [Å] | X-Perp [Å] | $\gamma$ [°] | Y-X(I)...Cg(J) [°] |
|----------------------------------------------|------------------|------------|--------------|--------------------|
| <b>1</b>                                     |                  |            |              |                    |
| P(1)-F(2)...Cg(1) <sup>a</sup>               | 3.06(3)          | -3.010     | 9.73         | 118.2(11)          |
| P(1)-F(4)...Cg(2)                            | 3.36(4)          | 2.970      | 27.64        | 118.0(16)          |
| P(1)-F(6)...Cg(2)                            | 3.19(2)          | 3.150      | 8.66         | 125.1(10)          |
| <b>2</b>                                     |                  |            |              |                    |
| Au(1)-Cl(1)...Cg(3) <sup>b</sup>             | 3.819(5)         | -3.449     | 25.45        | 104.74(11)         |
| P(1)-F(5)...Cg(4)                            | 3.175(11)        | -2.771     | 29.20        | 150.7(6)           |
| P(2)-F(10)...Cg(4)                           | 2.936(7)         | 2.867      | 12.49        | 138.6(3)           |
| P(2)-F(12)...Cg(3) <sup>c</sup>              | 3.118(7)         | 3.114      | 3.07         | 121.0(3)           |
| [AuCl(terpy)](PF <sub>6</sub> ) <sub>2</sub> |                  |            |              |                    |
| P(1)-F(2)...Cg(4)                            | 3.038(6)         | 2.784      | 23.60        | 152.9(7)           |
| P(1)-F(5)...Cg(2)                            | 3.012(9)         | -2.919     | 14.31        | 132.5(9)           |
| P(2)-F(9)...Cg(4)                            | 2.981(9)         | -2.956     | 7.55         | 132.5(4)           |

$\gamma$  = angle X(I)→Cg(J) vector and normal to plane J.

Cg1 is the centroid of atoms N(1)/C(1)/C(2)/C(3)/C(4)/C(5); Cg2 is the centroid of atoms N(3)/C(11)/C(12)/C(13)/C(14)/C(15); Cg3 is the centroid of atoms N(4)/C(19)/C(18)/C(17)/C(16)/C(20); Cg4 is the centroid of atoms N(2)/C(6)/C(7)/C(8)/C(9)/C(10);

Symmetry codes: (a) = 1/2+x, 1/2-y, 1/2+z; (b) = 1/2-x, 1/2+y, z; (c) = -x, 1-y, 1-z.

**Table S3.** Short  $\pi$ ... $\pi$  interactions for **1**.

| Cg(I)...Cg(J)              | Cg(I)...Cg(J) [Å] | $\alpha$ [°] | $\beta$ [°] | $\gamma$ [°] | Cg(I)-Perp [Å] | Cg(J)-Perp [Å] |
|----------------------------|-------------------|--------------|-------------|--------------|----------------|----------------|
| <b>1</b>                   |                   |              |             |              |                |                |
| Cg(2)...Cg(5) <sup>a</sup> | 3.736(5)          | 9.0(4)       | 22.26       | 17.92        | 3.555(4)       | -3.457(4)      |

$\alpha$  = dihedral angle between Cg(I) and Cg(J); Cg(I)-Perp = Perpendicular distance of Cg(I) on ring J; Cg(J)-Perp = perpendicular distance of Cg(J) on ring I;  $\beta$  = angle Cg(I)→Cg(J) vector and normal to ring I;  $\gamma$  = angle Cg(I)→Cg(J) vector and normal to plane J;

Cg2 is the centroid of atoms N(3)/C(11)/C(12)/C(13)/C(14)/C(15); Cg5 is the centroid of atoms N(4)/C(16)/C(17)/C(18)/C(19)/C(20);

Symmetry codes: (a) = -1+x, y, z.

**Table S4.** Short intra- and intermolecular hydrogen bonds detected in structures **1**, **2** and [AuCl(terpy)](PF<sub>6</sub>)<sub>2</sub>.

| D–H•••A                                      | D–H [Å] | H•••A [Å] | D–A [Å]   | D–H•••A[°] |
|----------------------------------------------|---------|-----------|-----------|------------|
| <b>1</b>                                     |         |           |           |            |
| C(1)–H(1)•••Cl(1)                            | 0.93    | 2.82      | 3.380(12) | 119.4      |
| C(2)–H(2)•••F(11) <sup>a</sup>               | 0.93    | 2.39      | 3.204(15) | 146.3      |
| C(3)–H(3)•••F(7) <sup>b</sup>                | 0.93    | 2.53      | 3.23(2)   | 132.0      |
| C(7)–H(7)•••N(4)                             | 0.93    | 2.36      | 2.711(14) | 101.7      |
| C(15)–H(15)•••Cl(1)                          | 0.93    | 2.79      | 3.356(11) | 120.4      |
| C(19)–H(19)•••F(8) <sup>c</sup>              | 0.93    | 2.55      | 3.222(18) | 129.8      |
| C(19)–H(19)•••F(9) <sup>c</sup>              | 0.93    | 2.43      | 3.348(17) | 170.1      |
| <b>2</b>                                     |         |           |           |            |
| C(2)–H(2)•••F(8) <sup>d</sup>                | 0.93    | 2.50      | 3.270(13) | 140.00     |
| C(2)–H(2)•••F(3) <sup>e</sup>                | 0.93    | 2.54      | 3.069(14) | 116.20     |
| C(4)–H(4)•••F(7) <sup>f</sup>                | 0.93    | 2.45      | 3.316(13) | 155.50     |
| C(4)–H(4)•••F(9) <sup>f</sup>                | 0.93    | 2.54      | 3.299(13) | 139.30     |
| C(7)–H(7)•••F(7) <sup>f</sup>                | 0.93    | 2.51      | 3.405(12) | 161.40     |
| C(9)–H(9)•••F(3) <sup>g</sup>                | 0.93    | 2.44      | 3.278(12) | 149.50     |
| C(12)–H(12)•••F(3) <sup>g</sup>              | 0.93    | 2.50      | 3.280(13) | 141.80     |
| C(13)–H(13)•••F(2) <sup>h</sup>              | 0.93    | 2.49      | 3.395(14) | 163.40     |
| C(14)–H(14)•••F(4) <sup>h</sup>              | 0.93    | 2.49      | 3.139(14) | 127.30     |
| C(15)–H(15)•••Cl(1)                          | 0.93    | 2.79      | 3.352(11) | 120.20     |
| C(15)–H(15)•••F(5) <sup>i</sup>              | 0.93    | 2.55      | 3.264(14) | 134.00     |
| C(18)–H(18)•••F(11) <sup>j</sup>             | 0.93    | 2.51      | 3.254(13) | 137.10     |
| C(19)–H(19)•••F(8) <sup>j</sup>              | 0.93    | 2.49      | 3.357(13) | 154.30     |
| C(20)–H(20)•••F(2) <sup>g</sup>              | 0.93    | 2.45      | 3.248(13) | 143.60     |
| [AuCl(terpy)](PF <sub>6</sub> ) <sub>2</sub> |         |           |           |            |
| C(1)–H(1)•••Cl(1)                            | 0.93    | 2.75      | 3.331(13) | 121.4      |
| C(9)–H(9)•••F(8) <sup>k</sup>                | 0.93    | 2.47      | 3.310(13) | 151.0      |
| C(14)–H(14)•••F(4) <sup>d</sup>              | 0.93    | 2.49      | 3.251(11) | 140.0      |
| C(15)–H(15)•••Cl(1)                          | 0.93    | 2.83      | 3.382(14) | 119.2      |

Symmetry codes: (a) =  $-1/2+x, 1/2-y, 1/2+z$ ; (b) =  $1/2+x, 1/2-y, 1/2+z$ ; (c) =  $1+x, y, z$ ; (d) =  $1-x, 1-y, 1-z$ ; (e) =  $1/2+x, y, 1/2-z$ ; (f) =  $1/2-x, -1/2+y, z$ ; (g) =  $-1/2+x, y, 1/2-z$ ; (h) =  $-x, 1/2+y, 1/2-z$ ; (i) =  $1/2-x, 1/2+y, z$ ; (j) =  $-1/2+x, 1/2-y$ ; (k) =  $-1+x, y, z$ ;

**Table S5.** Crystal data and structure refinement for [AuCl(terpy)](PF<sub>6</sub>)<sub>2</sub>.

| [AuCl(terpy)](PF <sub>6</sub> ) <sub>2</sub>     |                                                                                                       |
|--------------------------------------------------|-------------------------------------------------------------------------------------------------------|
| Empirical formula                                | C <sub>15</sub> H <sub>11</sub> AuClF <sub>12</sub> N <sub>3</sub> P <sub>2</sub>                     |
| Formula weight                                   | 755.62                                                                                                |
| Temperature [K]                                  | 295.0(2)                                                                                              |
| Wavelength [Å]                                   | 0.71073                                                                                               |
| Crystal system                                   | Triclinic                                                                                             |
| Space group                                      | P-1                                                                                                   |
| Unit cell dimensions [Å, °]                      | a = 7.6686(5)<br>b = 8.4908(6)<br>c = 17.6734(10)<br>α = 92.649(5)<br>β = 95.322(5)<br>γ = 112.313(7) |
| Volume [Å <sup>3</sup> ]                         | 1055.86(13)                                                                                           |
| Z                                                | 2                                                                                                     |
| Density (calculated) [Mg/m <sup>3</sup> ]        | 2.377                                                                                                 |
| Absorption coefficient [mm <sup>-1</sup> ]       | 7.360                                                                                                 |
| F(000)                                           | 712                                                                                                   |
| Crystal size [mm]                                | 0.16×0.042×0.025                                                                                      |
| θ range for data collection [°]                  | 3.309 to 25.048                                                                                       |
| Index ranges                                     | -6 ≤ h ≤ 9<br>-10 ≤ k ≤ 10<br>-21 ≤ l ≤ 20                                                            |
| Reflections collected                            | 9141                                                                                                  |
| Independent reflections                          | 3717 (R <sub>int</sub> = 0.0600)                                                                      |
| Completeness to 2θ                               | 99.7%                                                                                                 |
| Min. and max. transm.                            | 0.60729 and 1.000                                                                                     |
| Data / restraints / parameters                   | 3717 / 0 / 307                                                                                        |
| Goodness-of-fit on F <sup>2</sup>                | 1.018                                                                                                 |
| Final R indices [I > 2σ(I)]                      | R1 = 0.0602<br>wR2 = 0.1340                                                                           |
| R indices (all data)                             | R1 = 0.0807<br>wR2 = 0.1432                                                                           |
| Largest diff. peak and hole [e Å <sup>-3</sup> ] | 2.21 and -1.76                                                                                        |

**Table S6.** The bond lengths [ $\text{\AA}$ ] and angles [ $^\circ$ ] for  $[\text{AuCl}(\text{terpy})](\text{PF}_6)_2$ 

| <b>Bond lengths</b> |           |
|---------------------|-----------|
| Au(1)–N(1)          | 2.032(9)  |
| Au(1)–N(2)          | 1.935(9)  |
| Au(1)–N(3)          | 2.014(9)  |
| Au(1)–Cl(1)         | 2.253(3)  |
| <b>Bond angles</b>  |           |
| N(1)–Au(1)–N(2)     | 81.9(4)   |
| N(2)–Au(1)–N(3)     | 81.0(4)   |
| N(1)–Au(1)–N(3)     | 162.7(4)  |
| Cl(1)–Au(1)–N(1)    | 98.1(3)   |
| Cl(1)–Au(1)–N(2)    | 178.1(3)  |
| Cl(1)–Au(1)–N(3)    | 99.1(3)   |
| C(1)–N(1)–C(5)      | 122.3(10) |
| C(6)–N(2)–C(10)     | 124.2(10) |
| C(11)–N(3)–C(15)    | 120.9(10) |

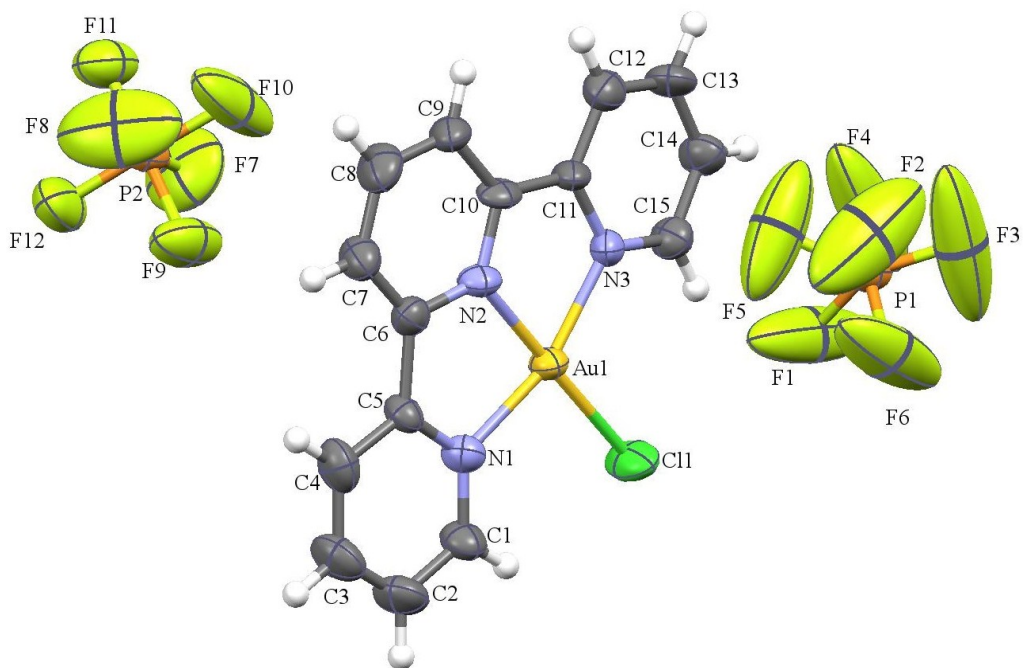

**Figure S8.** Molecular structure of  $[\text{AuCl}(\text{terpy})](\text{PF}_6)_2$  together with the atom numbering. Displacement ellipsoids are drawn at 50% probability level.

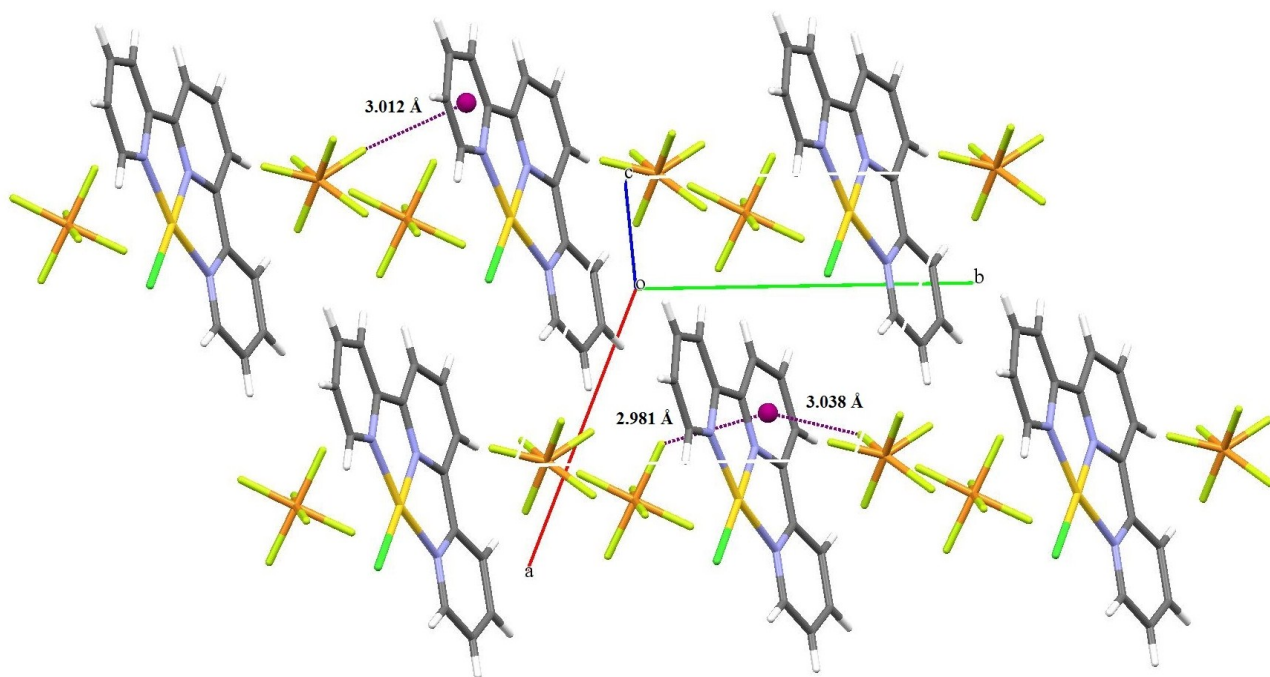

**Figure S9.** View of the supramolecular packing of  $[\text{AuCl}(\text{terpy})](\text{PF}_6)_2$  arising from weak  $\text{F}\cdots\pi$  type interactions.

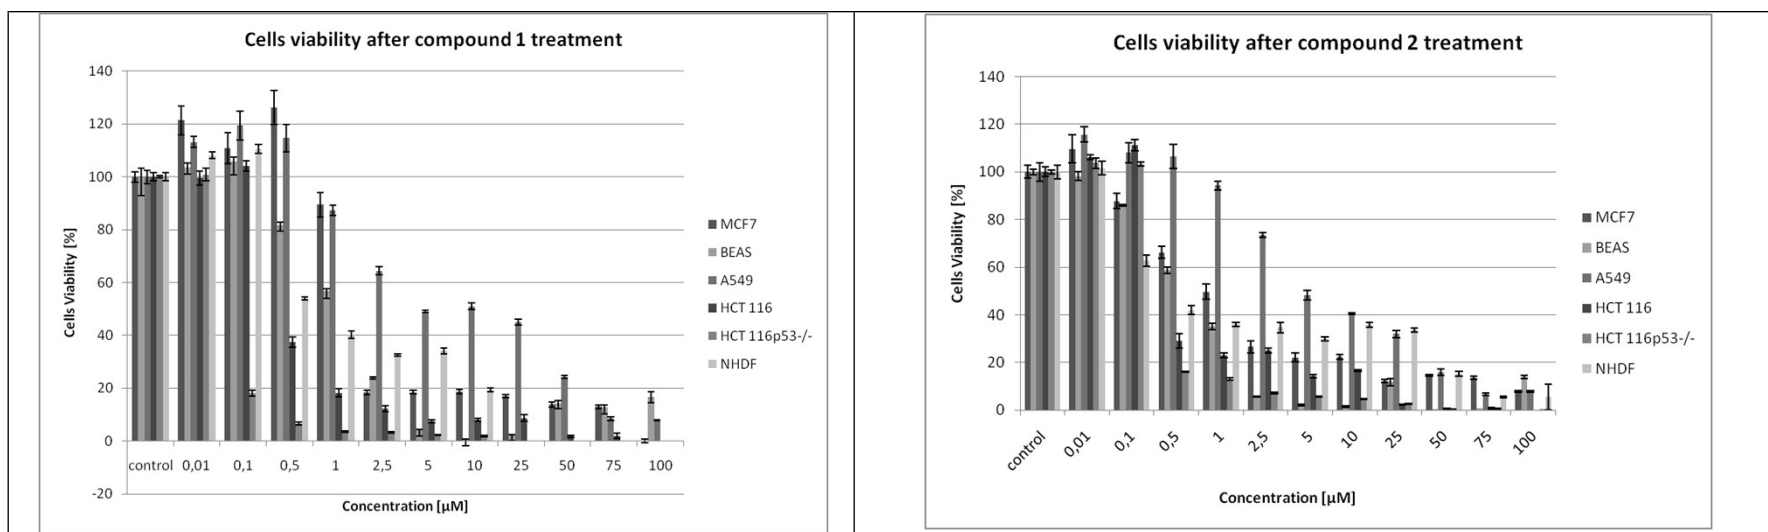

**Figure S10.** Cells viability after compounds **1** and **2** treatment

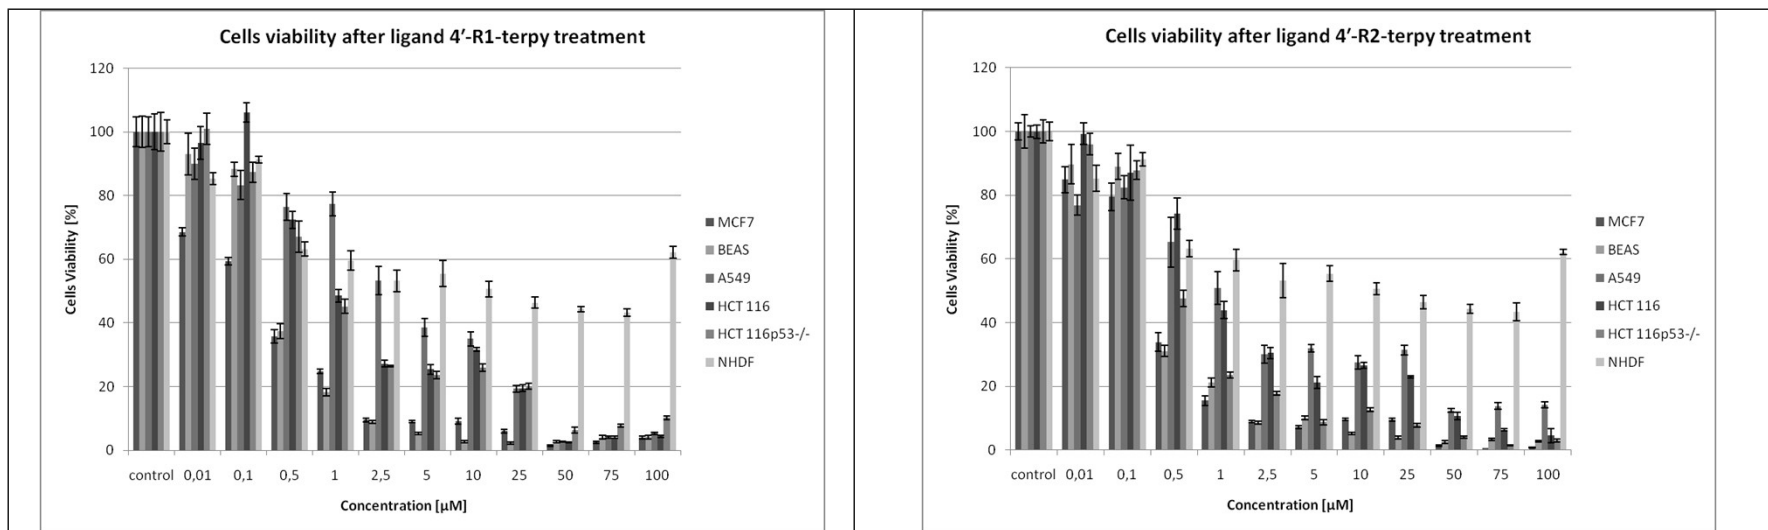

**Figure S11.** Cells viability after ligands 4'-R<sup>1</sup>-terpy and 4'-R<sup>2</sup>-terpy treatment

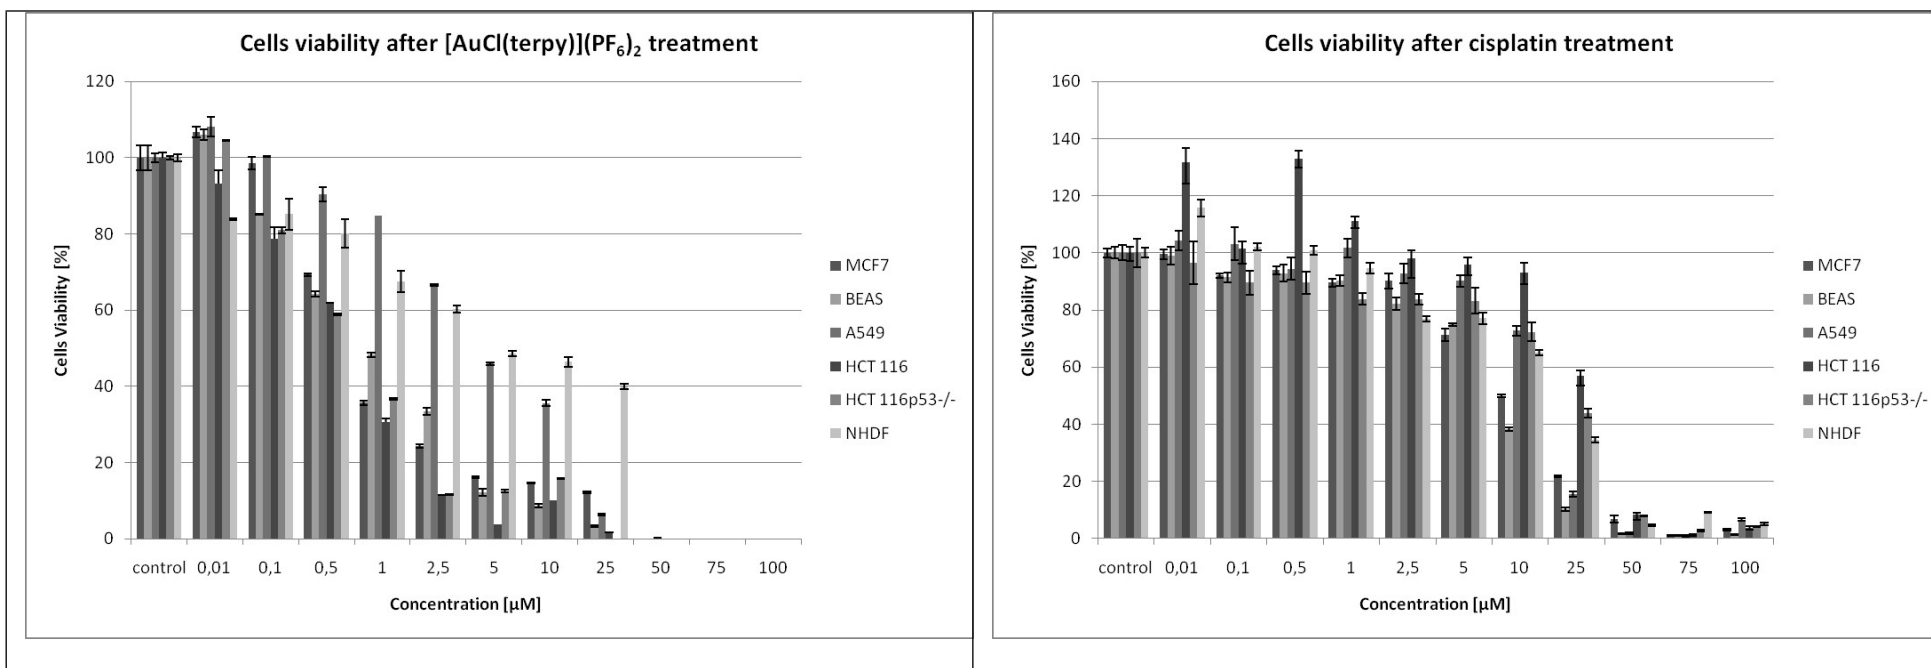

**Figure S12.** Cells viability after [AuCl(terpy)](PF<sub>6</sub>)<sub>2</sub> and cisplatin treatment



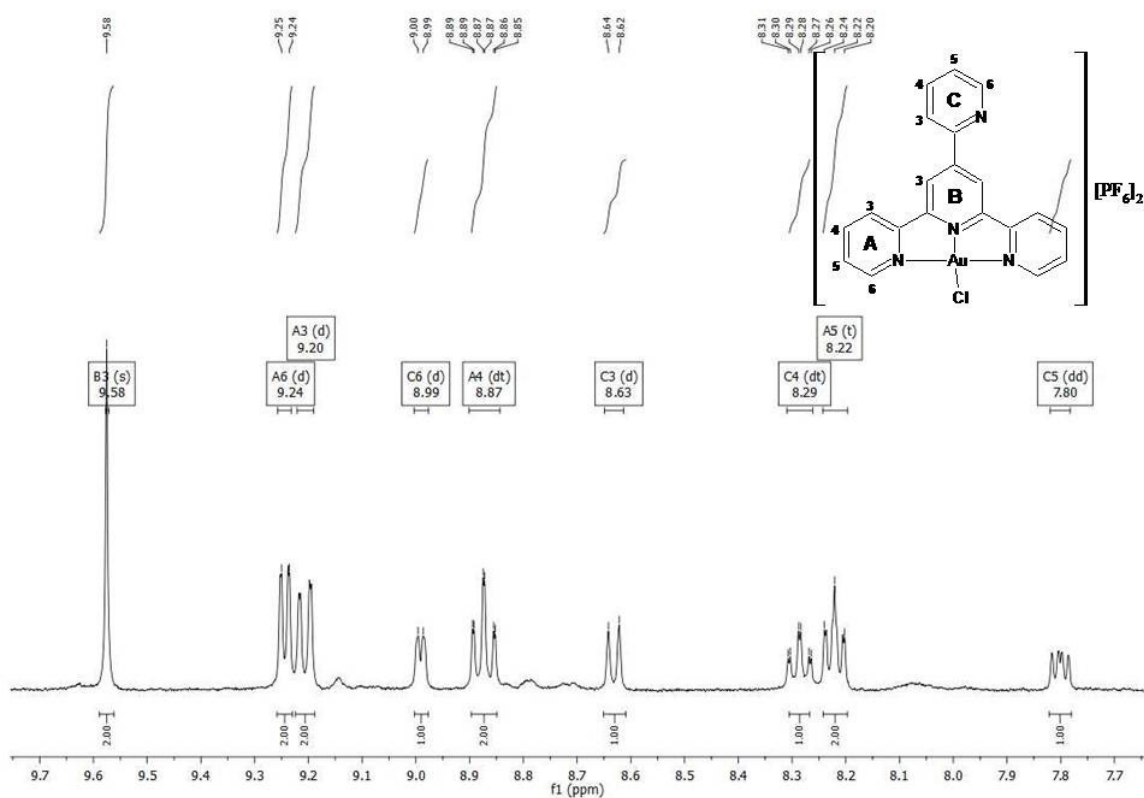

(a)

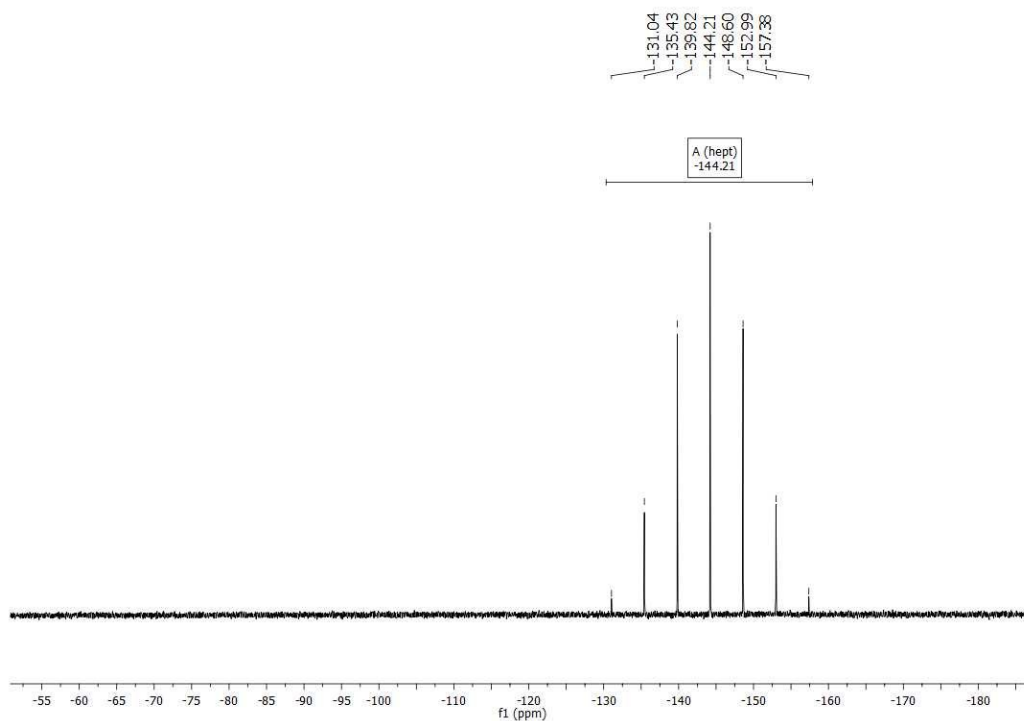

(b)

**Figure S13.** (a)  $^1\text{H}$  (400 MHz,  $\text{DMSO-d}_6$ ) and (b)  $^{31}\text{P}$  (162 MHz,  $\text{DMSO-d}_6$ ) NMR spectra of **1**. The assignment has been made on the basis of the literature data for the related complexes  $[\text{Au}(\text{terpy})\text{Cl}]^{2+}$ ,<sup>1,4</sup>  $[\text{AuCl}(\text{S-8})](\text{O}_3\text{SCF}_3)_2$ <sup>2</sup> (**S-8** = 4'-methylsulfanyl-2,2':6',2''-terpyridine),  $[\text{Au}(\text{C}_6\text{F}_5)(\eta^3\text{-terpy})](\text{PF}_6)_2$ <sup>9</sup> as well as  $^1\text{H}$  NMR spectra of the free ligands<sup>10,11</sup> were taken into consideration.

Presence of the low intensity signals in  $^1\text{H}$  NMR are due to instability of **1** in DMSO (evidenced by Uv-Vis monitoring)

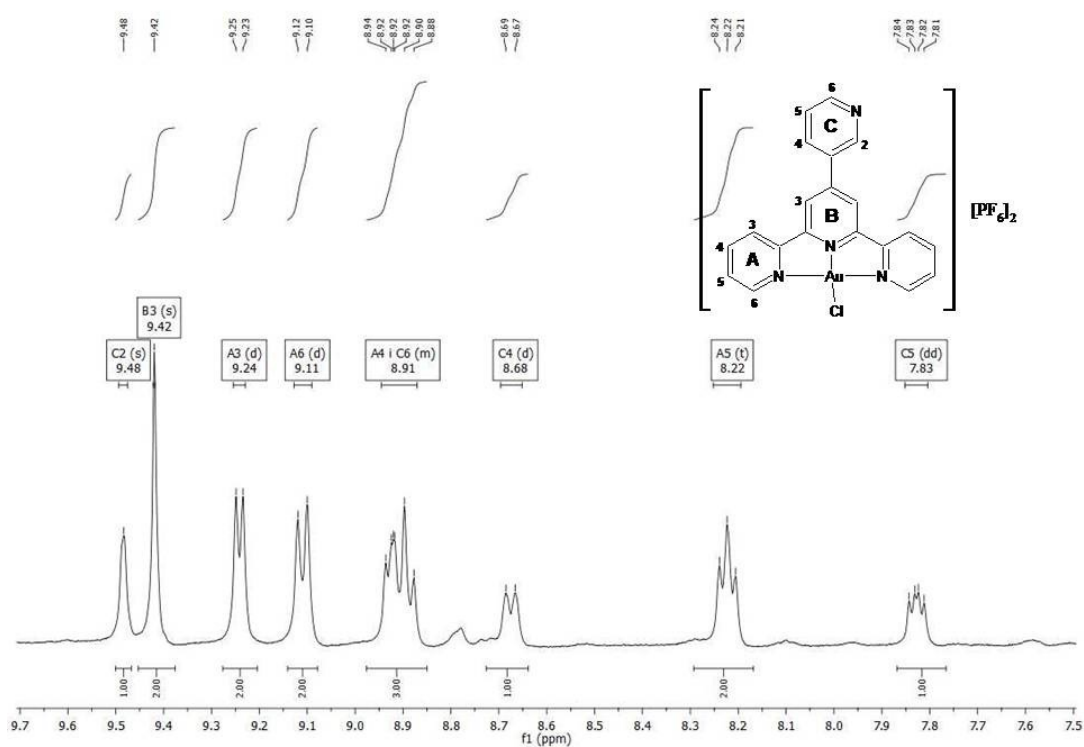

(a)

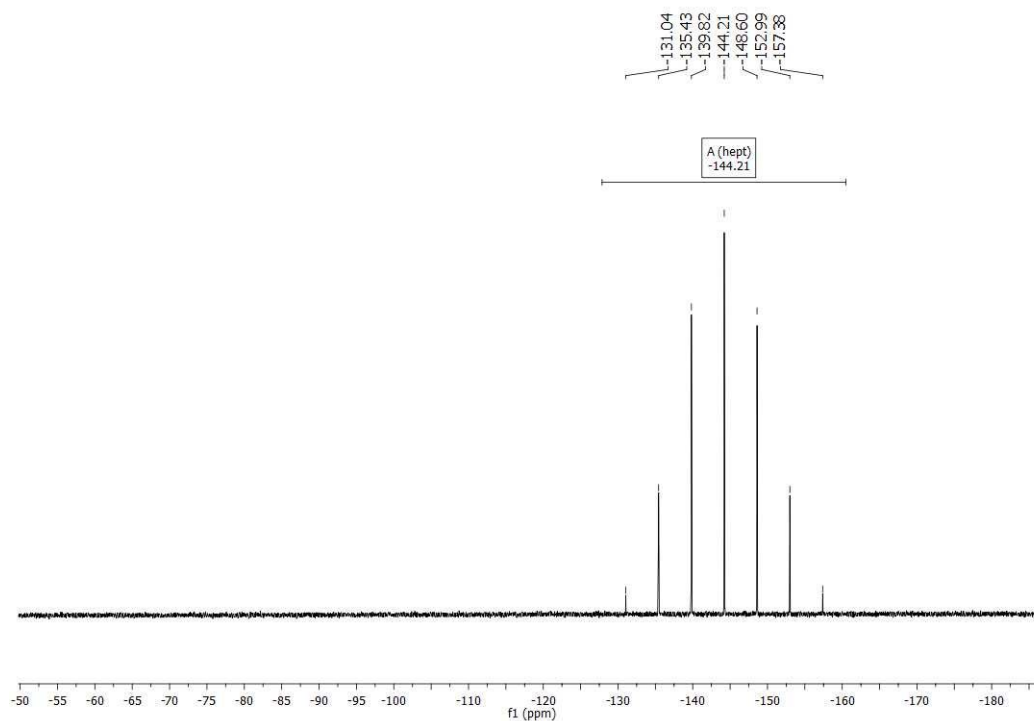

(b)

**Figure S14.** (a)  $^1\text{H}$  (400 MHz,  $\text{DMSO-d}_6$ ) and (b)  $^{31}\text{P}$  (162 MHz,  $\text{DMSO-d}_6$ ) NMR spectra of **2**. The assignment has been based on the literature data for the related complexes  $[\text{Au}(\text{terpy})\text{Cl}]^{2+}$ <sup>1, 4</sup>,  $[\text{AuCl}(\text{S-8})](\text{O}_3\text{SCF}_3)_2$ <sup>2</sup> (**S-8** = 4'-methylsulfanyl-2,2':6',2''-terpyridine),  $[\text{Au}(\text{C}_6\text{F}_5)(\eta^3\text{-terpy})](\text{PF}_6)_2$ <sup>9</sup> as well as  $^1\text{H}$  NMR spectra of the free ligands<sup>10, 11</sup> were taken into consideration.

Presence of the low intensity signals in  $^1\text{H}$  NMR are due to instability of **2** in DMSO (evidenced by Uv-Vis monitoring)

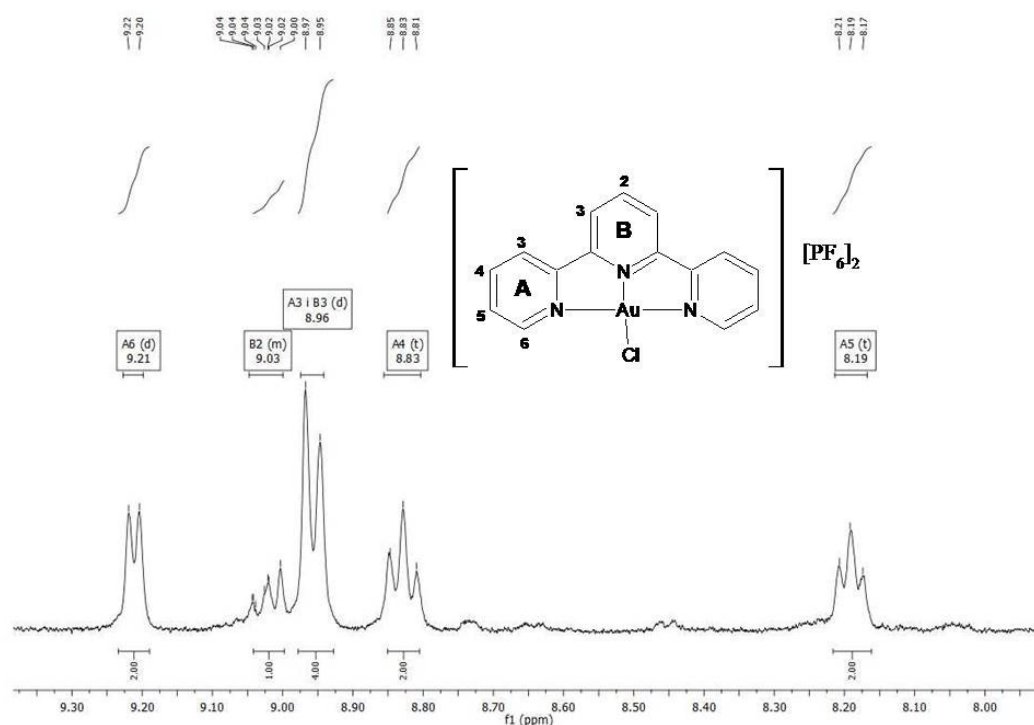

(a)

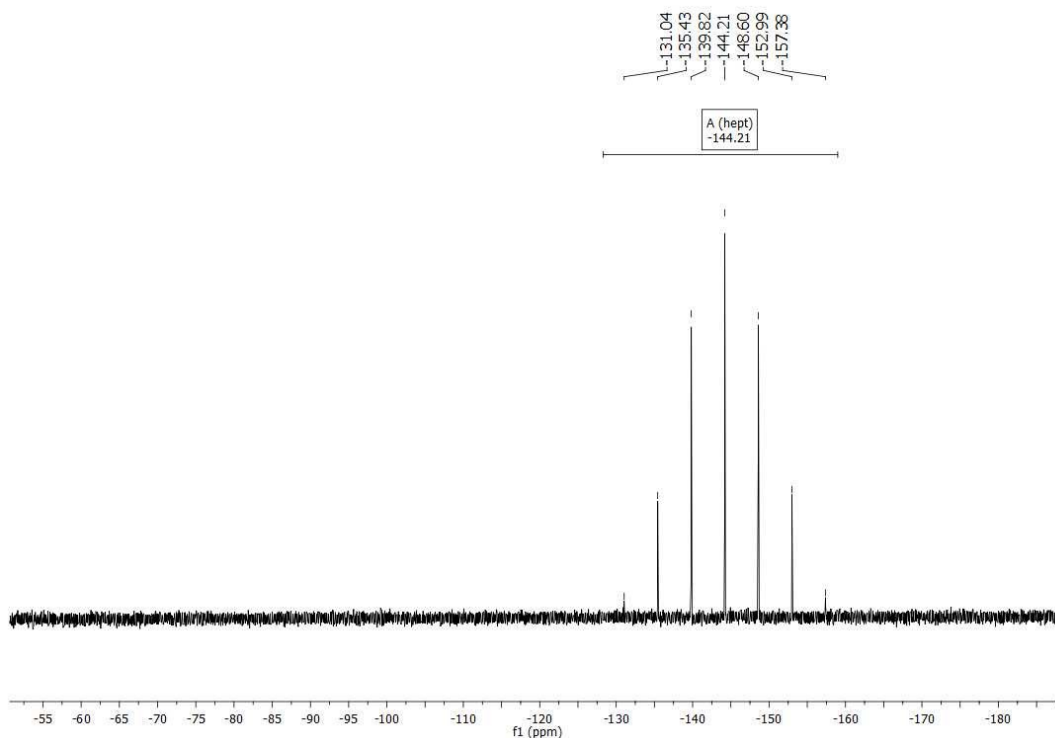

(b)

**Figure S15.** (a)  $^1\text{H}$  (a) (400 MHz,  $\text{DMSO-d}_6$ ) and (b)  $^{31}\text{P}$  (162 MHz,  $\text{DMSO-d}_6$ ) NMR spectra of  $[\text{AuCl}(\text{terpy})](\text{PF}_6)_2$ . The assignment has been made on the basis of the literature data for the related complexes  $[\text{Au}(\text{terpy})\text{Cl}]^{2+}$ ,<sup>1,4</sup>  $[\text{AuCl}(\text{S-8})](\text{O}_3\text{SCF}_3)_2$  ( $\text{S-8} = 4'$ -methylsulfanyl-2,2':6',2''-terpyridine),  $[\text{Au}(\text{C}_6\text{F}_5)(\eta^3\text{-terpy})](\text{PF}_6)_2$ <sup>9</sup> as well as  $^1\text{H}$  NMR spectra of the free ligands<sup>10,11</sup> were taken into consideration. Presence of the low intensity signals in  $^1\text{H}$  NMR are due to instability of  $[\text{AuCl}(\text{terpy})](\text{PF}_6)_2$  in  $\text{DMSO-d}_6$  (evidenced by Uv-Vis monitoring)

1. L. S. Hollis and S. J. Lippard, *J. Am. Chem. Soc.*, 1983, **105**, 4293
2. H-Q. Liu and T-C. Cheung, *J. Chem. Soc., Chem. Commun.*, 1995, 1787
3. U. S. Sampath and W. C. Putnam, *J. Chem. Soc., Dalton Trans.*, 1999, 2049
4. B. Pitteri and G. Marangoni, *J. Chem. Soc., Dalton Trans.*, 1999, 677
5. H.B.Friedrich, G.E.M.Maguire, B.S.Martincigh, M.G. McKay and L.K.Pietersen, *Acta Crystallogr., Sect. E: Struct. Rep. Online*, 2008, **64**, m1240
6. V. Gomez and M. C. Hartwick, *J. Chem. Crystallogr.*, 2012, **42**, 824
7. R. Corbo, T. P. Pell, B. D. Stringer, C. F. Hogan, D. J. D. Wilson, P. J. Barnard and J. L. Dutton, *J. Am. Chem. Soc.*, 2014, **136**, 12415
8. S. Iwashita, Y. Saito, H. Ohtsu and K. Tsuge, *J. Chem. Soc., Dalton Trans.*, 2014, **43**, 15719
9. M. C. Gimeno, J. M. López-de-Luzuriaga, E. Manso, M. Monge, M. E. Olmos, M. Rodríguez-Castillo, M.-T. Tena, D. P. Day, E. J. Lawrence and G. G. Wildgoose, *Inorg. Chem.*, 2015, **54**, 10667
10. C. B. Smith, C. L. Raston and A. N. Sobolev, *Green Chem.*, 2005, **7**, 650–654
11. A. Maroń, A. Szlapa, T. Klemens, S. Kula, B. Machura, S. Krompiec, J. G. Małecki, A. Świtlicka-Olszewska, K. Erfurt and A. Chrobok, *Organic & Biomolecular Chemistry*, 2016, **14**, 3793-3808
